# Supplementary material for: Rule-Mining for the Early Prediction of Chronic Kidney Disease Based on Metabolomics and Multi-Source Data
Source: PLoS One. 2016 Nov 18;11(11):e0166905. doi: 10.1371/journal.pone.0166905 (PMC5115883; doi:10.1371/journal.pone.0166905)
Supplement: S1 Dataset — In sheet 1 is provided the discretized data used for the supervised analysis and in sheet 2 the related metadata. (XLS) [file pone.0166905.s001.xls]

## Sheet: Sheet1
S1 Dataset. Data used for the supervised analysis.
In Sheet 1 is provided the discretized data used for the supervised analysis and in Sheet 2 the related metadata.
eGFR	Age	Sex	BMI	AHT	Ethnicity	UTP	UALB	URBP	Ub2MG	Ua1MG	UTF	Fibrosis	Bucket 0.20	Bucket 0.24	Bucket 0.28	Bucket 0.32	Bucket 0.36	Bucket 0.40	Bucket 0.44	Bucket 0.48	Bucket 0.52	Bucket 0.56	Bucket 0.60	Bucket 0.64	Bucket 0.68	Bucket 0.72	Bucket 0.76	Bucket 0.80	Bucket 0.84	Bucket 0.88	Bucket 0.92	Bucket 0.96	Bucket 1.00	Bucket 1.04	Bucket 1.08	Bucket 1.12	Bucket 1.16	Bucket 1.20	Bucket 1.24	Bucket 1.28	Bucket 1.32	Bucket 1.36	Bucket 1.40	Bucket 1.44	Bucket 1.48	Bucket 1.52	Bucket 1.56	Bucket 1.60	Bucket 1.64
2	2	1	2	1	4	1	2	1	3	2	1	2	1	1	1	1	2	1	1	1	1	2	1	1	1	3	3	2	1	2	2	2	4	2	2	2	3	10	10	10	2	3	9	6	3	4	3	4	6
1	5	2	2	1	3	4	4	1	3	4	4	2	10	10	10	10	10	10	10	10	10	10	9	9	10	10	10	10	10	9	9	9	9	9	9	9	8	9	8	8	7	8	9	10	9	9	9	9	9
1	6	2	2	1	3	4	4	4	4	4	4	4	1	1	1	1	1	6	1	1	5	1	1	4	6	8	8	8	8	9	7	9	9	8	7	6	10	10	7	3	10	10	9	8	9	7	6	7	9
1	6	2	2	1	3	1	1	1	2	2	1	3	3	7	2	2	3	1	3	2	3	2	2	2	3	4	4	5	3	6	5	2	5	7	8	8	7	5	7	7	10	7	6	4	4	4	10	9	8
1	5	2	4	1	3	2	3	1	2	2	2		2	2	2	2	2	2	1	1	1	1	1	1	1	1	2	3	2	2	3	3	3	3	4	8	2	2	4	5	1	2	3	3	2	3	3	2	3
2	2	2	2	2	1	2	1	1	2	2	2	2	5	6	5	6	6	6	6	5	6	6	5	5	5	6	5	4	4	1	2	3	4	4	4	3	4	3	8	4	1	2	3	2	2	2	3	1	2
2	5	2	3	1	1	2	3	1	1	2	2	2	2	5	2	3	2	4	4	4	1	3	1	5	3	3	4	3	3	2	4	5	6	4	4	4	2	2	2	5	3	4	4	6	8	6	4	3	4
1	2	2	2	1	3	2	1	1	1	2	2	2	1	1	1	1	1	1	1	1	2	1	1	1	1	2	1	1	2	2	1	1	4	2	1	1	1	1	6	1	4	2	1	1	1	1	1	1	3
1	6	2	3	1	3	3	4	3	3	4	4	2	9	9	9	9	9	9	9	9	9	9	10	10	9	9	8	8	8	7	7	8	8	8	6	4	5	6	5	2	2	2	6	9	10	9	6	5	8
1	5	1	4	1	3	3	4	1	3	3	4	3	7	1	2	2	1	1	2	1	2	1	5	4	5	5	8	8	7	7	8	6	7	7	5	6	7	5	6	6	8	7	4	4	3	3	4	5	5
1	3	1	1	1	3	3	4	2	2	3	4	3	1	2	3	2	2	2	2	2	3	4	4	4	3	3	3	3	4	3	3	3	2	3	5	5	5	2	3	2	1	4	2	3	4	7	2	6	5
2	1	1		2	3	2	2	1	2	2	2	1	2	4	3	3	3	1	2	2	3	3	1	2	1	1	1	2	1	1	2	3	1	1	3	3	5	5	5	10	6	7	8	8	3	3	3	2	1
1	4	2	2	1	5	2	2	4	4	4	2	2	4	5	6	6	5	5	5	5	5	5	10	6	3	3	2	2	2	1	1	8	10	10	10	1	3	1	1	1	2	10	1	8	10	10	10	4	4
2	2	2	3	1	3	1	2	1	1	2	2	2	4	3	3	2	3	2	2	2	1	4	3	1	1	1	2	3	2	4	3	3	5	4	7	7	2	3	10	9	8	8	8	6	9	9	8	8	7
1	3	2	3	1	3	2	3	1	2	1	2	2	5	4	7	5	2	5	1	4	4	4	3	4	2	2	4	4	3	10	10	7	8	10	9	7	7	8	8	10	10	8	6	8	7	9	10	9	10
1	5	1	3	1	3	2	2	1	3	2	2	2	6	4	4	3	3	4	4	2	2	3	2	2	2	2	2	2	1	1	1	1	2	1	1	1	1	1	1	1	2	1	1	1	2	1	1	1	1
1	4	2	2	1	1	3	4	2	2	3	3		3	6	6	4	3	4	5	2	4	6	6	7	7	7	7	7	8	8	8	9	9	8	6	4	4	4	3	2	3	6	7	6	6	5	6	7	7
1	4	2	2	1	3	2	4	2	1	2	4	3	7	8	7	7	7	7	7	7	7	8	7	8	8	8	8	8	8	8	8	9	8	8	6	5	7	10	4	3	8	10	6	7	6	7	6	8	8
1	6	1	3	1	1	2	3	1	4	3	3		8	6	8	8	8	7	8	6	6	7	10	10	5	7	5	6	5	3	2	4	3	4	3	3	9	4	10	8	5	2	6	10	10	10	6	4	8
2	1	1		2	1	3	4	1	2	2	4	2	10	10	10	10	10	10	10	10	10	10	9	9	10	10	10	10	9	9	9	9	9	10	10	10	8	7	8	9	6	8	9	10	10	9	10	10	9
1	1	2		2	3							2	7	4	7	7	5	8	6	8	6	6	6	6	5	5	5	5	4	2	2	2	3	5	4	4	3	3	4	3	3	5	5	5	5	5	5	6	5
1	6	2		1	3	4	4						8	7	8	9	9	9	9	8	8	9	9	9	9	9	9	9	9	9	10	10	10	9	9	6	8	10	7	6	6	9	10	10	9	9	10	10	10
1	4	2	3	1	3	2	3	1	1	2	2		8	2	9	5	8	9	6	7	7	9	7	4	9	7	8	7	6	6	5	5	5	6	2	3	5	4	4	5	8	4	4	4	4	3	4	5	5
1	6	2	4	1	3	3	4	3	4	4	4	3	5	4	6	6	6	6	7	7	8	8	8	8	8	9	8	9	9	9	8	9	9	9	8	9	5	4	5	4	4	9	6	9	10	10	10	10	7
2	4	1	2	1	3	3	4	1	2	2	3	2	4	6	6	5	6	6	5	5	6	5	5	5	5	6	4	4	4	2	3	4	3	3	4	3	6	3	2	7	4	1	7	7	4	4	4	4	4
1	3	1	2	1	3	2	3	4	4	4	3	2	1	1	2	1	1	1	2	1	1	1	1	1	1	1	2	1	1	1	1	1	1	1	1	1	1	1	1	1	1	1	1	1	1	1	1	1	1
2	1	2	2	2	3	1		1	2	2	1	3	3	4	4	4	4	3	4	3	2	3	2	2	2	2	3	3	4	5	5	5	6	5	7	6	3	5	8	9	6	6	5	4	5	6	5	5	6
2	1	1	2	2	3	1		1	2	1	1	2	7	6	3	5	5	3	4	3	4	2	2	2	2	2	2	1	1	2	2	2	2	2	3	3	8	5	4	10	8	4	8	6	2	2	5	5	3
1	2	1	2	1	4	3		4	4	4	4	3	8	9	8	8	8	8	8	8	8	8	8	9	8	8	7	7	7	7	7	10	10	10	4	5	3	4	6	5	2	1	2	3	2	3	4	10	10
1	5	2	3	1	3	2		1	4	3	1	3	6	4	4	7	5	4	6	6	4	5	4	3	6	4	4	4	10	10	10	3	2	2	3	3	2	3	3	3	4	7	3	3	5	4	3	5	3
1	6	2	4	1	3	3	4	1	1	2	3	3	2	2	3	1	2	7	6	6	7	8	7	8	7	8	7	8	8	7	7	8	8	7	8	4	5	7	5	2	5	10	4	6	10	10	5	5	6
1	4	1	2	1	3	2	2	4	4	4	2	3	9	9	9	9	9	10	9	9	9	9	9	9	9	9	9	10	9	9	9	10	10	9	9	9	6	5	9	9	4	5	10	9	7	9	9	10	10
2	1	2	4	2	3	4	4	1	1	2	4	2	4	3	4	2	4	2	2	3	2	2	1	2	1	1	1	1	3	2	3	6	2	2	1	7	4	2	3	6	1	3	2	2	2	2	1	2	2
1	4	2	3	1	1	1	2	1	1	2	2	2	10	10	10	10	10	10	10	10	10	10	10	10	10	10	10	10	10	10	10	10	10	10	10	10	9	9	10	9	9	8	10	10	10	10	10	10	10
2	4	2	3	1	1	2	4	1	1	2	3	3	5	5	5	5	4	4	5	5	5	5	5	5	5	5	4	5	4	3	3	4	4	5	5	7	4	2	7	6	2	3	4	3	3	4	3	3	3
1	5	2	3	1	3	1		1	1	2	1		3	3	3	3	4	2	2	3	2	2	2	2	2	1	2	2	1	2	4	2	1	2	2	2	3	3	7	3	2	4	4	1	3	3	1	1	2
1		2		2	3	3	4	4	4	4	4		10	10	10	10	10	10	10	10	10	10	9	10	9	10	10	10	9	9	8	9	9	10	10	9	9	7	8	5	6	7	7	9	8	9	9	8	9
1	1	2	3	1	1	2		1	1	2	4	2	10	10	10	10	10	10	10	10	10	10	10	10	10	10	10	10	10	9	9	9	9	9	9	10	10	10	9	7	9	9	9	9	8	9	9	9	9
1	6	2	4	1	3	2	2	1	1	2	2		1	3	2	1	1	3	2	2	2	1	2	1	1	1	1	2	2	3	3	2	2	1	2	5	2	6	9	5	6	3	3	2	2	1	2	3	3
1	6	2		1	3	2	2	3	4	3	2	3	7	8	5	7	7	8	8	7	5	7	7	6	7	6	6	7	5	5	5	5	6	7	6	4	4	5	4	6	3	4	4	5	4	4	4	6	7
1	3	2	4	1	3	3	4	3	2	3	4	3	7	6	7	7	7	6	7	7	7	7	7	7	10	8	6	7	7	8	7	7	7	5	3	2	1	1	2	1	3	3	2	2	3	3	1	1	1
1	1	1	2	2	2	4	4	4	4	4	4	3	9	9	9	10	8	9	9	9	9	9	9	9	9	9	9	9	10	10	10	9	9	8	8	5	7	8	6	6	9	10	5	8	9	8	8	7	8
1	4	2	3	1	1							3	6	2	3	2	1	2	2	6	4	3	3	6	4	4	4	5	5	6	6	7	6	5	3	5	10	9	4	4	8	8	5	7	9	7	5	7	6
1	1	1	2	1	1	3		1	3	3	4	2	3	3	6	6	5	5	5	5	5	6	6	6	6	6	6	6	6	3	2	3	4	3	2	2	2	1	1	2	1	1	2	1	1	1	1	1	1
1		1		2	3	3	3	2	3	2	3		9	8	8	8	8	8	8	8	8	9	8	8	9	9	9	9	9	8	8	8	8	9	9	10	8	7	4	5	6	9	7	9	10	9	9	8	8
1	3	2		1	3	1	2	2	3	3	2	3	5	4	5	3	3	2	5	4	4	4	3	3	3	2	3	3	3	4	6	5	4	3	5	5	3	3	8	6	5	5	5	4	5	5	3	3	3
1	4	2	3	2	3	2	2	1	1	2	3	3	6	3	6	4	5	5	3	4	6	6	5	5	6	6	6	6	6	5	5	6	6	6	6	8	5	4	8	6	3	3	4	4	4	5	5	5	4
2	4	2		1	3	2	3	1	1	2	2	2	7	7	6	6	5	5	5	6	6	5	5	5	5	4	5	5	6	8	8	7	6	6	6	10	10	10	10	9	6	7	5	5	4	5	5	6	6
1	3	1		2	4	1	2				1	3	6	5	3	5	6	3	4	3	2	4	4	3	2	3	2	3	4	4	4	2	2	2	2	3	2	4	3	8	3	3	3	6	5	4	5	7	7
1	6	2	2	2	1	2	2	1	4	2	2		5	6	6	6	6	6	6	5	4	4	4	4	3	3	1	2	2	1	1	1	1	2	1	1	1	1	1	1	2	1	1	2	6	2	1	2	2
1	2	2	2	1	4	4	4	4	3	4	4	3	5	8	8	9	9	8	9	8	8	8	9	9	9	9	9	9	10	10	10	10	10	9	9	9	10	10	6	4	8	10	9	10	8	8	8	9	10
1	4	1		1	5							4	4	5	3	5	5	5	7	6	6	7	4	6	6	4	6	6	5	3	4	4	4	4	3	2	2	6	3	1	1	2	4	2	2	2	2	2	1
2	5	1	2	1	3	1	2	1	2	1	1	2	3	2	3	3	5	3	3	2	3	2	2	3	2	3	3	2	2	6	10	2	1	2	6	9	7	9	9	9	10	8	7	4	8	6	7	6	4
1	5	2	3	1	3	2	3	3	4	3	3	3	8	8	8	8	8	8	8	8	8	7	7	7	7	7	6	6	7	5	6	6	7	7	10	7	5	3	3	3	3	6	8	5	7	8	5	3	3
2	2	1		2	4	2		1	2	2	3	2	8	8	9	9	8	8	8	8	9	8	8	8	8	8	7	7	8	6	8	6	5	6	10	10	10	9	2	5	5	6	6	7	7	8	9	9	10
1	6	2	3	1	3	3	4	4	4	4	4	3	9	9	8	9	9	8	9	9	9	9	9	9	9	9	9	9	9	10	9	10	10	9	9	9	7	6	9	8	5	9	10	10	9	10	9	10	10
1	3	1	2	1	3	2	3	1	2	2	3	3	2	3	7	6	2	1	2	4	2	1	3	1	5	4	3	6	3	4	3	3	3	2	1	3	4	2	6	10	7	4	3	1	2	3	2	3	6
1	4	1	3	1	1	2	2	1	1	2	2	3	7	7	6	7	6	6	6	6	6	6	6	5	6	5	3	4	3	3	2	2	2	3	3	3	4	3	2	4	5	4	4	3	3	2	2	3	2
1	6	1		1	3	4	4	1	4	4	4	3	10	10	10	10	10	10	10	10	10	10	10	10	10	10	10	10	10	10	9	10	10	10	10	10	10	10	10	9	9	5	9	10	9	10	10	10	10
1	6	2	2	1	1	2	3	1	1		1	3	5	6	5	6	4	4	4	4	5	4	3	4	3	3	1	1	2	1	1	1	1	1	1	2	10	9	1	1	1	7	8	1	1	1	1	1	5
1	4	2	2	1	5	2	2	2	3	3	2	3	3	6	4	6	4	3	4	5	3	3	4	4	4	4	3	5	4	4	7	6	5	4	4	7	6	5	4	5	7	5	5	6	7	6	8	9	7
1		2		2	3	2	3	1	3	2	3	3	8	8	8	8	8	9	8	8	8	9	8	8	8	8	8	8	8	7	5	6	6	7	5	5	8	5	5	4	6	9	3	5	4	4	5	5	4
1	1	1	2	1	1	3	4	4	3	4	4	3	8	8	9	8	8	9	9	9	9	8	8	9	8	8	9	9	10	10	10	9	7	6	6	4	6	7	2	4	2	2	7	5	4	4	4	5	4
1	2	1	1	1	3	2	2	1	3	2	2	3	5	5	5	5	6	5	6	6	5	5	4	4	5	6	4	4	6	7	4	4	2	4	6	6	6	7	5	10	10	2	5	5	7	7	6	6	3
2	2	1	2	2	3	1		2	2	1	2	2	4	5	5	4	3	3	4	3	3	4	3	3	3	2	4	3	3	3	3	2	3	4	3	1	1	2	2	3	4	1	3	3	3	3	4	4	2
1	3	2	2	2	3	3	4				4	2	10	10	10	10	10	10	10	10	10	10	9	10	10	10	10	10	10	9	9	10	10	10	10	9	8	8	7	8	7	6	9	10	9	10	10	10	10
1	1	1	2	2	3	2	3	1	2	1	2	2	1	1	1	1	4	1	1	1	1	1	1	1	1	3	2	1	1	2	1	1	1	1	1	1	1	1	1	2	6	1	1	1	1	1	9	1	1
2	1	2		2	3	1	2	1	2	1	2	2	4	2	5	6	4	6	3	5	6	6	6	5	4	6	7	6	6	7	6	6	5	6	7	8	6	8	9	9	9	7	9	8	7	7	8	8	8
1	6	2	3	1	3	2	2	4	4	4	2	3	6	7	7	7	6	7	8	9	8	9	8	8	8	8	9	9	8	8	7	7	6	6	7	8	8	7	6	7	8	4	8	8	4	4	7	8	8
2	2	1		1	4	2		1	2	2	3	2	7	7	7	7	7	7	7	7	7	7	7	7	6	6	5	5	6	4	4	4	5	4	5	8	6	6	9	10	9	9	10	4	5	6	6	4	3
1	3	1	2	1	3	4	4	2	3	4	4	2	9	9	9	9	9	9	9	9	9	9	9	9	9	9	9	9	9	9	8	8	9	9	8	7	7	6	5	7	7	5	7	9	8	7	8	9	9
1	3	2	3	1	3	1	2					2	3	2	2	2	2	4	4	5	3	2	3	2	4	4	3	4	4	5	4	6	3	3	2	6	6	4	5	8	8	5	7	8	5	5	7	4	5
1		2		2	2	2	2	4	4	4	1	3	2	1	2	3	2	5	5	5	4	4	6	6	6	5	6	5	6	6	7	8	4	5	5	8	10	10	10	6	7	7	10	7	1	1	2	2	2
1	6	1		1	5	2		1	4	3	2	3	2	2	4	5	4	2	3	5	4	7	6	7	7	7	6	6	6	6	6	5	7	7	8	8	4	8	7	8	7	8	3	4	5	5	6	5	4
1	3	2		1	3	2		1	2	2	2	3	5	7	6	6	7	5	5	6	7	6	5	6	5	5	6	6	5	4	4	5	4	5	5	4	4	4	5	4	4	2	3	5	3	3	4	4	4
2	2	2	2	1	3	2		1	2	2	3	2	1	1	1	4	1	7	5	4	7	3	7	7	7	7	8	6	7	8	6	8	7	7	8	10	8	5	8	7	5	7	7	7	8	7	5	6	6
1	5	1	2	1	3	1	2	1	1	2	2	2	2	2	3	3	2	2	3	1	1	1	3	2	2	2	2	3	3	5	6	7	6	5	4	6	5	6	7	6	7	7	10	5	6	6	6	6	7
1	2	2	2	1	3	2	3	1	3	2	2	3	6	5	7	7	6	7	6	7	8	6	6	7	7	6	7	6	6	6	5	6	6	7	7	9	9	7	8	8	7	5	8	6	7	7	7	6	6
1	3	2	4	1	3	2	3	1	3	2	3	3	4	8	4	2	7	4	7	8	7	5	6	4	6	6	7	7	5	6	6	5	7	7	7	6	2	2	4	4	3	5	2	3	5	5	2	2	2
1	1	1	3	1	2	2	2	1	1	1	2	2	3	3	2	2	1	4	6	1	2	2	5	3	4	4	4	3	3	3	3	4	2	2	2	4	9	3	2	3	6	3	2	2	1	1	2	3	2
1	1	2	2	1	4	3	4	2	2	3	4	3	10	10	10	9	10	9	10	10	10	10	10	10	10	10	10	10	10	10	10	10	10	10	10	9	9	9	10	8	9	6	10	10	10	10	10	10	10
1	4	1	2	2	3	1	2	3	4	3		2	6	6	1	1	5	5	1	4	3	2	2	3	3	1	2	1	1	1	1	1	1	1	1	1	1	2	1	1	3	2	1	1	1	1	1	1	1
1	2	2	3	1	5	1	2					3	3	4	4	3	3	3	3	3	2	3	2	2	2	2	1	2	3	4	5	4	3	3	7	5	5	8	7	7	9	10	6	4	6	8	8	8	5
1		1	2	1	2	3	4	3	4	3	3	2	4	5	2	4	3	6	3	4	5	6	5	6	7	7	7	7	7	4	2	2	3	4	3	1	7	1	1	2	1	1	1	1	2	2	3	2	5
1	5	1	2	2	3	4		4	4	4	2	3	10	10	10	10	10	10	10	10	10	10	10	10	10	10	10	10	9	8	9	8	9	9	9	8	7	9	5	6	8	5	8	9	7	6	8	8	8
1	2	2	3	1	4	2	3	1	2	2	3	2	9	9	9	9	9	9	8	8	8	7	7	7	7	7	7	7	7	7	7	7	6	6	6	6	4	7	6	5	5	5	6	7	6	5	7	7	6
1	6	2	3	1	3	2	3	2	2	3	2		6	3	1	1	1	3	1	2	3	4	3	3	4	4	5	5	4	5	3	4	4	3	3	1	1	2	2	2	10	3	2	2	2	2	3	2	2
2	1	1	4	1	4	4	4	2	3	3	4	3	10	10	10	10	10	10	10	10	10	10	10	10	10	10	10	10	10	10	9	10	10	10	10	10	9	7	9	10	9	8	8	9	9	9	9	10	9
1	6	1	4	1	3	3	2	3	4	4	2	3	10	10	10	10	10	10	10	10	10	10	10	10	10	10	10	9	9	8	8	8	8	8	9	6	6	8	2	3	4	6	8	8	6	6	7	8	8
1	3	1	4	1	3	2	4	1	2	2	3	3	9	9	9	8	9	9	9	9	8	8	8	8	8	7	7	7	7	4	4	4	5	7	4	5	3	1	1	2	1	1	2	2	1	3	3	3	2
2		2		2	3	2	2	1	3	3	2	2	3	5	5	4	3	4	3	3	4	4	10	3	3	2	1	1	2	3	10	3	3	3	2	2	4	2	10	8	4	3	4	10	10	8	3	3	4
1		1		2	3	3	2	2	2	3	2	2	6	4	5	5	7	6	6	6	6	6	4	5	4	5	3	3	5	6	5	3	3	4	4	10	10	9	7	8	10	6	8	5	4	4	9	9	9
1	5	1	3	1	3	1	1	1	3	3	1	2	4	2	4	3	4	1	2	2	1	1	1	1	1	1	1	1	1	1	1	1	1	1	2	2	2	6	3	2	10	10	2	2	3	2	2	2	1
1		2		2	2	1		4	4	3	1	3	1	1	1	1	1	1	1	3	1	1	2	1	1	1	1	1	2	2	2	1	2	1	5	7	9	4	4	7	8	10	1	2	10	10	7	4	9
1		2		2	3	2	3	1	2	2	2		9	8	8	8	8	8	8	8	9	8	8	7	8	7	8	8	8	7	7	7	8	8	8	10	9	8	10	9	5	4	6	6	5	5	7	8	7
1		2		2	3	1		1	1	2	1	3	8	8	8	7	7	7	7	6	6	5	4	5	4	3	3	2	1	1	1	1	1	1	1	1	1	1	2	1	2	1	1	1	1	1	1	1	1
1		1		2	1	2	3	3	3	2	2	4	2	3	1	3	6	2	3	1	4	2	3	3	4	4	5	4	5	5	6	5	8	5	4	4	3	8	6	2	4	10	10	4	6	5	4	4	3
1	3	1	4	1	3	2	2					3	1	7	4	4	7	6	7	2	5	3	6	3	4	3	6	5	5	5	5	6	5	5	7	7	8	8	6	5	10	10	6	6	8	7	6	6	6
2		2		2	3	2	3	1	2	2	3	2	8	9	8	9	9	8	8	9	9	8	8	8	7	8	8	8	8	7	6	7	8	8	8	8	6	6	6	9	7	4	5	7	8	6	7	7	7
1	6	1	2	1	3	2	2	4	4	4	2	3	9	9	9	8	9	9	9	9	9	9	9	9	9	9	9	8	8	6	7	8	7	8	7	6	5	4	3	4	5	9	5	7	8	10	8	7	6
1		1		2	2	3	4	1	3	3	4	3	2	3	1	4	5	5	7	4	5	5	5	5	3	5	5	4	5	10	10	8	7	10	5	2	7	8	5	10	10	6	7	9	6	6	10	9	8
2		2		2	3	2	3	1	2	2	2		7	6	2	2	1	2	3	7	1	3	4	6	6	5	5	4	6	7	6	7	7	6	8	7	6	10	9	7	9	8	7	7	9	8	8	8	7
1		2		2	1	2	3	1	2	2	2	4	2	1	6	5	6	7	1	7	7	7	7	8	8	9	9	9	9	9	8	7	8	8	9	8	9	9	9	10	10	8	9	8	7	8	9	9	9
2		2		2	3	2	2	1	2	2	2	2	6	7	7	7	7	4	5	4	5	5	5	6	5	5	4	4	5	5	4	4	5	6	6	7	8	5	7	7	7	6	5	5	7	8	7	6	5
2		1		2	4	2	4	1	2	2	4	2	9	9	9	9	9	8	9	9	9	8	8	8	8	8	7	8	7	5	5	5	7	8	8	9	9	7	3	10	9	9	10	9	6	8	8	7	5
1	5	2	4	1	3								8	7	7	8	8	7	7	7	7	7	7	7	7	7	8	8	7	8	9	10	9	9	7	4	3	6	9	7	5	6	9	8	6	6	7	7	9
1		2	4	2	1	1	2	3	4	3	1	2	1	1	1	1	2	1	1	1	1	2	2	1	2	2	5	2	2	3	1	3	5	3	1	2	2	3	1	1	4	9	1	3	8	7	2	3	5
1		2	4	2	1	1	2	3	4	3	1	2	5	4	4	4	3	3	4	3	3	3	1	2	2	1	1	1	1	1	2	1	1	1	2	2	10	6	3	3	3	9	2	3	5	8	2	2	1
1	1	1	3	1	3	2	2	4	2	3	2	1	7	7	7	8	7	7	7	7	7	7	6	7	6	6	6	7	7	8	9	9	8	6	10	5	1	10	10	3	1	3	10	7	1	2	6	4	7
1		2	4	1	3	2	3	1	2	2	3	2	4	5	5	4	4	3	4	3	3	5	4	4	4	5	5	5	4	4	4	5	4	5	5	3	3	9	8	4	2	2	3	3	3	2	4	7	4
[truncated: 147 more columns]

## Sheet: Sheet2
eGFR
estimated glomerular filtration rate
(ml/min/1.73m2)
0: < 60
1: ≥ 60
age
(year)
1: < 35
2: [35 ; 45[
3: [45 ; 55[
4: [55 ; 65[
5: [65 ; 75[
6: ≥ 75
sex
1: man
2: woman
BMI
body mass index
(kg/m2)
1: < 18.5 (i.e., underweight)
2: [18.5 ; 25.0[ (i.e., normal weight)
3: [25.0 ; 30.0[ (i.e., overweight)
4: ≥ 30 (i.e., obesity)
AHT
arterial hypertension
1: yes
2: no
Ethnicity
1: Africa
2: Asia
3: Maghreb
4: Europe
5: West Indies
UTP
urinary total protein
(g/l)
1: 0.0 (i.e., under the detection threshold)
2: [0.1 ; 0.5[
3: [0.5 ; 1[
4: ≥ 1
UALB
urinary albumin
(mg/l)
1: 0.0 (i.e., under the detection threshold)
2: [0.1 ; 75[
3: [75 ; 200[
4: ≥ 200
URBP
urinary retinol binding protein
(mg/l)
1: 0.0 (i.e., under the detection threshold)
2: [0.1 ; 1[
3: [1 ; 2[
4: ≥ 2
Ub2MG
urinary β2-microglobulin
(μg/l)
1: 0.0 (i.e., under the detection threshold)
2: [0.1 ; 100[
3: [100 ; 1000[
4: ≥ 1000
Ua1MG
urinary α1-microglobulin
(mg/l)
1: 0.0 (i.e., under the detection threshold)
2: [0.1 ; 5[
3: [5 ; 10[
4: ≥ 10
UTF
urinary transferrin
(mg/l)
1: 0.0 (i.e., under the detection threshold)
2: [0.1 ; 5[
3: [5 ; 15[
4: ≥ 15
Fibrosis
interstital fibrosis extent
(% of total surface area)
1: < 10
2: [10 ; 25[
3: [25 ; 50[
4: ≥ 50
Bucket x
part of the 1H NMR spectra (urine metabolomic data)
1 to 10 = The buckets were discretized with a quantile-based discretization into 10 bins.
